# Supplementary material for: Variation in calcification of Reticulofenestra coccoliths over the Oligocene–Early Miocene
Source: Copernicus journal article supplement (doi:10.5194/bg-19-5007-2022), 2022-10-27
Supplement: Supplementary file 1 [file bg-19-5007-2022-supplement.zip]

Archive with 3 entries (3 files):
- Table S1.xlsx
- bg-19-5007-2022-supplement-title-page.pdf
- Table S2.xlsx
