# Supplementary material for: Variation in calcification of Reticulofenestra coccoliths over the Oligocene–Early Miocene
Source: Copernicus journal article supplement (doi:10.5194/bg-19-5007-2022), 2022-10-27
Supplement: Supplementary file 1 [file bg-19-5007-2022-supplement.zip › bg-19-5007-2022-supplement-title-page.pdf]

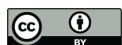

*Supplement of*

**Variation in calcification of *Reticulofenestra* coccoliths over the Oligocene–Early Miocene**

**José Guitián et al.**

*Correspondence to:* José Guitián ([jose.guitian@uvigo.es](mailto:jose.guitian@uvigo.es)) and Heather Stoll ([heather.stoll@erdw.ethz.ch](mailto:heather.stoll@erdw.ethz.ch))

- [bg-19-5007-2022-supplement-title-page.pdf](#)
- [Table S1.xlsx](#)
- [Table S2.xlsx](#)

The copyright of individual parts of the supplement might differ from the article licence.
