# Supplementary material for: Variation in calcification of Reticulofenestra coccoliths over the Oligocene–Early Miocene
Source: Copernicus journal article supplement (doi:10.5194/bg-19-5007-2022), 2022-10-27
Supplement: Supplementary file 1 [file bg-19-5007-2022-supplement.zip › Table S2.xlsx]

## Sheet: Table S2
Table S2. Subset of Reticulofenestra coccoliths from 3.5 to 4.5 μm
	Median ks	Median ks ellip	Thickness	Length	Circularity
Median ks
Median ks ellip	-0.0396231
Thickness	0.658865	0.783143
Length	0.345796	0.395782	0.629891
Circularity	0.610036	-0.808697	-0.155876	-0.0978028
