# Supplementary material for: Variation in calcification of Reticulofenestra coccoliths over the Oligocene–Early Miocene
Source: Copernicus journal article supplement (doi:10.5194/bg-19-5007-2022), 2022-10-27
Supplement: Supplementary file 1 [file Table S1.xlsx]

## Sheet: TableS1
Table S1. Samples description and parameters obtained.										MEDIAN					MEAN					Error 2nd STDEV ks
Site	Hole	Core	Section	Half	Interval Top	Interval Bot	Depth (mbsf)	Age (Ma)	Measured specimens	ks	kse	Thickness (µm)	Length (µm)	Circularity	ks	kse	Thickness (µm)	Length (µm)	Circularity	Error 2nd STDEV ks	Error 2nd STDEV kse	Error 2nd STDEV Thickness (µm)	Error 2nd STDEV Length (µm)	Error 2nd STDEV Circularity	%( Disco+Sph)/ (Retics+Pelag)	CaCO3 %	NAR (coccoliths*cm2/ kyr)
1406	A	2H	5	W	36	40	12.58	18	185	0.066	0.191	0.528935	5.27	0.902	0.0644199	0.201561	0.468733	4.45814	0.883901	0.00272284	0.00770237	0.0207597	0.251683	0.00920476	0.014	43	6139
1406	A	3H	2	W	4.5	8	12.58	18.4	159	0.05	0.157	0.484392	5.93	0.894	0.0499313	0.156861	0.467342	5.73168	0.883009	0.00221764	0.00487087	0.01755	0.264443	0.00981275	0.037	44	4894
1406	A	3H	5	W	124	128	22.838	18.8	58	0.048	0.143	0.497938	6.59	0.901	0.0455467	0.139418	0.48237	6.57028	0.888761	0.00343032	0.00721779	0.0289707	0.526521	0.0156855	0.041	46	5223
1406	A	4H	3	W	81	85	29.028	20.7	382	0.065	0.173	0.450453	4.51	0.917	0.061285	0.17473	0.450858	4.72901	0.904685	0.00157632	0.00313391	0.0163127	0.183822	0.00581957	0.01	45	22546
1406	A	6H	6	W	74	80	52.47	22	517	0.061	0.158	0.494323	5.5	0.929	0.0575595	0.159017	0.472841	5.36445	0.91184	0.00119572	0.00214225	0.0131972	0.14865	0.00500807	0.022	43	14357
1406	A	9H	6	W	91	95	81.158	23.1	225	0.062	0.175	0.362273	3.6	0.908	0.0592145	0.172331	0.377446	4.05555	0.900049	0.00179632	0.0037561	0.0162107	0.187477	0.00710623	0.008	49	68828
1406	A	10H	7	W	37	41	91.288	23.8	267	0.061	0.155	0.422124	4.66	0.934	0.0594033	0.152884	0.429286	4.88934	0.928138	0.00144642	0.00255387	0.0172972	0.19789	0.0046521	0.016	42	14656
1406	A	13H	3	W	97	103	114.7	25.3	225	0.058	0.147	0.44379	5.06	0.926	0.0544358	0.147631	0.439859	5.32565	0.916066	0.0017575	0.002949	0.0232304	0.255769	0.00629312	0.026	40	26287
1406	A	14H	4	W	97	103	125.7	25.8	181	0.058	0.15	0.439876	5.16	0.928	0.0534486	0.14593	0.4443	5.46042	0.914531	0.00212662	0.00409546	0.0289145	0.344994	0.00781538	0.018	35	23151
1406	A	16H	4	W	26	30	143.978	26.6	383	0.057	0.158	0.379031	4.28	0.91	0.0536642	0.157602	0.406252	4.79471	0.89801	0.00137985	0.00296617	0.0169293	0.226542	0.00576773	0.011	39	52945
1406	A	16H	6	W	66	70	147.377	28.3	620	0.058	0.169	0.367859	3.83	0.901	0.054774	0.165871	0.373989	4.25869	0.891151	0.0012306	0.00252138	0.0103425	0.143295	0.0048016	0.006	40	34144
